# Supplementary material for: Ataluren Prevented Bone Loss Induced by Ovariectomy and Aging in Mice Through the BMP-SMAD Signaling Pathway
Source: Research Square preprint supplement (doi:10.21203/rs.3.rs-1427992/v1), 2022-03-22
Supplement: Supplementary file 1 [file 26cceb594724439d4b383c66.xlsx]

## Sheet: Sheet1
initial_alias	converted_alias	name	description	style
5992	RFX4	RFX5	regulatory factor X4	up
120400	NXPE1	NXPE2	neurexophilin and PC-esterase domain family member 1	up
245909	DEFB106A	DEFB106A	defensin beta 106A	up
503841	DEFB106B	DEFB106B	defensin beta 106B	up
154043	CNKSR3	CNKSR3	CNKSR family member 3	up
127343	DMBX1	DMBX1	diencephalon/mesencephalon homeobox 1	up
100129654	TCF24	TCF24	transcription factor 24	up
9650	MTFR1	MTFR1	mitochondrial fission regulator 1	up
27334	P2RY10	P2RY10	P2Y receptor family member 10	up
152206	CCDC13	CCDC13	coiled-coil domain containing 13	up
254268	AKNAD1	AKNAD1	AKNA domain containing 1	up
6368	CCL23	CCL23	C-C motif chemokine ligand 23	up
9478	CABP1	CABP1	calcium binding protein 1	up
81623	DEFB126	DEFB126	defensin beta 126	up
6711	SPTBN1	SPTBN1	spectrin beta, non-erythrocytic 1	up
133491	C5orf47	C5orf47	chromosome 5 open reading frame 47	up
5818	NECTIN1	NECTIN1	nectin cell adhesion molecule 1	up
56159	TEX11	TEX11	testis expressed 11	up
145858	C15orf32	C15orf32	chromosome 15 putative open reading frame 32	up
6943	TCF21	TCF21	transcription factor 21	up
29940	DSE	DSE	dermatan sulfate epimerase	up
27197	GPR82	GPR82	G protein-coupled receptor 82	up
132954	PDCL2	PDCL2	phosducin like 2	up
80003	PCNX2	PCNX2	pecanex 2	up
10586	MAB21L2	MAB21L2	mab-21 like 2	up
57644	MYH7B	MYH7B	myosin heavy chain 7B	up
254773	LYG2	LYG2	lysozyme g2	up
5149	PDE6H	PDE6H	phosphodiesterase 6H	up
9024	BRSK2	BRSK2	BR serine/threonine kinase 2	up
55800	SCN3B	SCN3B	sodium voltage-gated channel beta subunit 3	up
3347	HTN3	HTN3	histatin 3	up
59283	CACNG8	CACNG8	calcium voltage-gated channel auxiliary subunit gamma 8	up
100126325	MIR935	MIR935	microRNA 935	up
101928271	LINC02850	LINC02850	long intergenic non-protein coding RNA 2850	up
284274	SMIM21	SMIM21	small integral membrane protein 21	up
144132	DNHD1	DNHD1	dynein heavy chain domain 1	up
4114	MAGEB3	MAGEB3	MAGE family member B3	up
554	AVPR2	AVPR2	arginine vasopressin receptor 2	up
9542	NRG2	NRG2	neuregulin 2	up
10501	SEMA6B	SEMA6B	semaphorin 6B	up
10881	ACTL7A	ACTL7A	actin like 7A	up
353149	TBC1D26	TBC1D26	TBC1 domain family member 26	up
222826	FAM217A	FAM217A	family with sequence similarity 217 member A	up
63973	NEUROG2	NEUROG2	neurogenin 2	up
54549	SDK2	SDK2	sidekick cell adhesion molecule 2	up
4647	MYO7A	MYO7A	myosin VIIA	up
63827	BCAN	BCAN	brevican	up
2204	FCAR	FCAR	Fc alpha receptor	up
23308	ICOSLG	ICOSLG	inducible T cell costimulator ligand	up
102723996	LOC102723996	LOC102723996	ICOS ligand	up
894	CCND2	CCND2	cyclin D2	up
8828	NRP2	NRP2	neuropilin 2	up
219736	STOX1	STOX1	storkhead box 1	up
1038	CDR1	CDR1	cerebellar degeneration related protein 1	up
100130155	MIR124-2HG	MIR124-2HG	MIR124-2 host gene	up
389874	ZCCHC13	ZCCHC13	zinc finger CCHC-type containing 13	up
84440	RAB11FIP4	RAB11FIP4	RAB11 family interacting protein 4	up
861	RUNX1	RUNX1	RUNX family transcription factor 1	up
2993	GYPA	GYPA	glycophorin A (MNS blood group)	up
100506305	LINC00958	LINC00958	long intergenic non-protein coding RNA 958	up
9976	CLEC2B	CLEC2B	C-type lectin domain family 2 member B	up
2043	EPHA4	EPHA4	EPH receptor A4	up
9355	LHX2	LHX2	LIM homeobox 2	up
30813	VSX1	VSX1	visual system homeobox 1	up
9899	SV2B	SV2B	synaptic vesicle glycoprotein 2B	up
8863	PER3	PER3	period circadian regulator 3	up
203611	CDY2B	CDY2B	chromodomain Y-linked 2B	up
253175	CDY1B	CDY1B	chromodomain Y-linked 1B	up
9085	CDY1	CDY1	chromodomain Y-linked 1	up
253175	CDY1B	CDY1B	chromodomain Y-linked 1B	up
9085	CDY1	CDY1	chromodomain Y-linked 1	up
9426	CDY2A	CDY2A	chromodomain Y-linked 2A	up
162073	ITPRIPL2	ITPRIPL2	ITPRIP like 2	up
27036	SIGLEC7	SIGLEC7	sialic acid binding Ig like lectin 7	up
54893	MTMR10	MTMR10	myotubularin related protein 10	up
81285	OR51E2	OR51E2	olfactory receptor family 51 subfamily E member 2	up
6689	SPIB	SPIB	Spi-B transcription factor	up
158248	TTC16	TTC16	tetratricopeptide repeat domain 16	up
8530	CST7	CST7	cystatin F	up
140469	MYO3B	MYO3B	myosin IIIB	up
8074	FGF23	FGF23	fibroblast growth factor 23	up
27165	GLS2	GLS2	glutaminase 2	up
100506888	ELOA3DP	ELOA3DP	elongin A3 family member D, pseudogene	up
162699	ELOA3P	ELOA3P	elongin A3, pseudogene	up
107983955	ELOA3CP	ELOA3CP	elongin A3 family member C, pseudogene	up
728929	ELOA3BP	ELOA3BP	elongin A3 family member B, pseudogene	up
6546	SLC8A1	SLC8A1	solute carrier family 8 member A1	up
7161	TP73	TP73	tumor protein p73	up
84966	IGSF21	IGSF21	immunoglobin superfamily member 21	up
25789	TMEM59L	TMEM59L	transmembrane protein 59 like	up
5294	PIK3CG	PIK3CG	phosphatidylinositol-4,5-bisphosphate 3-kinase catalytic subunit gamma	up
23093	TTLL5	TTLL5	tubulin tyrosine ligase like 5	up
22999	RIMS1	RIMS1	regulating synaptic membrane exocytosis 1	up
430	ASCL2	ASCL2	achaete-scute family bHLH transcription factor 2	up
1158	CKM	CKM	creatine kinase, M-type	up
140894	CNBD2	CNBD2	cyclic nucleotide binding domain containing 2	up
6847	SYCP1	SYCP1	synaptonemal complex protein 1	up
54798	DCHS2	DCHS2	dachsous cadherin-related 2	up
412	STS	STS	steroid sulfatase	up
22986	SORCS3	SORCS3	sortilin related VPS10 domain containing receptor 3	up
1544	CYP1A2	CYP1A2	cytochrome P450 family 1 subfamily A member 2	up
199920	FYB2	FYB2	FYN binding protein 2	up
101927667	LINC01535	LINC01535	long intergenic non-protein coding RNA 1535	up
131368	ZPLD1	ZPLD1	zona pellucida like domain containing 1	up
140687	GCNT7	GCNT7	glucosaminyl (N-acetyl) transferase family member 7	up
125115	KRT40	KRT40	keratin 40	up
2657	GDF1	GDF1	growth differentiation factor 1	up
10715	CERS1	CERS1	ceramide synthase 1	up
2555	GABRA2	GABRA2	gamma-aminobutyric acid type A receptor subunit alpha2	up
153	ADRB1	ADRB1	adrenoceptor beta 1	up
5950	RBP4	RBP4	retinol binding protein 4	down
7153	TOP2A	TOP2A	DNA topoisomerase II alpha	down
5334	PLCL1	PLCL1	phospholipase C like 1 (inactive)	down
8038	ADAM12	ADAM12	ADAM metallopeptidase domain 12	down
55245	UQCC1	UQCC1	ubiquinol-cytochrome c reductase complex assembly factor 1	down
283298	OLFML1	OLFML1	olfactomedin like 1	down
116372	LYPD1	LYPD1	LY6/PLAUR domain containing 1	down
1646	AKR1C2	AKR1C2	aldo-keto reductase family 1 member C2	down
1645	AKR1C1	AKR1C1	aldo-keto reductase family 1 member C1	down
23136	EPB41L3	EPB41L3	erythrocyte membrane protein band 4.1 like 3	down
154091	SLC2A12	SLC2A12	solute carrier family 2 member 12	down
7056	THBD	THBD	thrombomodulin	down
2919	CXCL1	CXCL1	C-X-C motif chemokine ligand 1	down
129607	CMPK2	CMPK2	cytidine/uridine monophosphate kinase 2	down
22999	RIMS1	RIMS1	regulating synaptic membrane exocytosis 1	down
100861412	FSBP	FSBP	fibrinogen silencer binding protein	down
25788	RAD54B	RAD54B	RAD54 homolog B	down
81624	DIAPH3	DIAPH3	diaphanous related formin 3	down
10659	CELF2	CELF2	CUGBP Elav-like family member 2	down
8076	MFAP5	MFAP5	microfibril associated protein 5	down
7881	KCNAB1	KCNAB1	potassium voltage-gated channel subfamily A regulatory beta subunit 1	down
10974	ADIRF	ADIRF	adipogenesis regulatory factor	down
119385	AGAP11	AGAP11	ArfGAP with GTPase domain, ankyrin repeat and PH domain 11	down
407045	MIR7-3	MIR7-3	microRNA 7-3	down
23512	SUZ12	SUZ12	SUZ12 polycomb repressive complex 2 subunit	down
81539	SLC38A1	SLC38A1	solute carrier family 38 member 1	down
1646	AKR1C2	AKR1C2	aldo-keto reductase family 1 member C2	down
1645	AKR1C1	AKR1C1	aldo-keto reductase family 1 member C1	down
100505648	RAD51-AS1	RAD51-AS1	RAD51 antisense RNA 1	down
5999	RGS4	RGS4	regulator of G protein signaling 4	down
7464	CORO2A	CORO2A	coronin 2A	down
9369	NRXN3	NRXN3	neurexin 3	down
728411	GUSBP1	GUSBP1	GUSB pseudogene 1	down
25925	ZNF521	ZNF521	zinc finger protein 521	down
22871	NLGN1	NLGN1	neuroligin 1	down
4256	MGP	MGP	matrix Gla protein	down
5308	PITX2	PITX2	paired like homeodomain 2	down
83869	TTTY14	TTTY14	testis-specific transcript, Y-linked 14	down
51454	GULP1	GULP1	GULP PTB domain containing engulfment adaptor 1	down
11095	ADAMTS8	ADAMTS8	ADAM metallopeptidase with thrombospondin type 1 motif 8	down
84674	CARD6	CARD6	caspase recruitment domain family member 6	down
64927	TTC23	TTC23	tetratricopeptide repeat domain 23	down
90268	OTULIN	OTULIN	OTU deubiquitinase with linear linkage specificity	down
10435	CDC42EP2	CDC42EP2	CDC42 effector protein 2	down
65987	KCTD14	KCTD14	potassium channel tetramerization domain containing 14	down
3751	KCND2	KCND2	potassium voltage-gated channel subfamily D member 2	down
219285	SAMD9L	SAMD9L	sterile alpha motif domain containing 9 like	down
10521	DDX17	DDX17	DEAD-box helicase 17	down
51426	POLK	POLK	DNA polymerase kappa	down
144501	KRT80	KRT80	keratin 80	down
57419	SLC24A3	SLC24A3	solute carrier family 24 member 3	down
79750	ZNF385D	ZNF385D	zinc finger protein 385D	down
10659	CELF2	CELF2	CUGBP Elav-like family member 2	down
4045	LSAMP	LSAMP	limbic system associated membrane protein	down
133418	EMB	EMB	embigin	down
9411	ARHGAP29	ARHGAP29	Rho GTPase activating protein 29	down
8076	MFAP5	MFAP5	microfibril associated protein 5	down
5197	PF4V1	PF4V1	platelet factor 4 variant 1	down
5999	RGS4	RGS4	regulator of G protein signaling 4	down
25871	NEPRO	NEPRO	nucleolus and neural progenitor protein	down
84708	LNX1	LNX1	ligand of numb-protein X 1	down
7881	KCNAB1	KCNAB1	potassium voltage-gated channel subfamily A regulatory beta subunit 1	down
100506013	APELA	APELA	apelin receptor early endogenous ligand	down
284266	SIGLEC15	SIGLEC15	sialic acid binding Ig like lectin 15	down
3759	KCNJ2	KCNJ2	potassium inwardly rectifying channel subfamily J member 2	down
57419	SLC24A3	SLC24A3	solute carrier family 24 member 3	down
2042	EPHA3	EPHA3	EPH receptor A3	down
283131	NEAT1	NEAT1	nuclear paraspeckle assembly transcript 1	down
10891	PPARGC1A	PPARGC1A	PPARG coactivator 1 alpha	down
4223	MEOX2	MEOX2	mesenchyme homeobox 2	down
1047	CLGN	CLGN	calmegin	down
79937	CNTNAP3	CNTNAP3	contactin associated protein family member 3	down
728577	CNTNAP3B	CNTNAP3B	contactin associated protein family member 3B	down
6424	SFRP4	SFRP4	secreted frizzled related protein 4	down
10521	DDX17	DDX17	DEAD-box helicase 17	down
6372	CXCL6	CXCL6	C-X-C motif chemokine ligand 6	down
23136	EPB41L3	EPB41L3	erythrocyte membrane protein band 4.1 like 3	down
3070	HELLS	HELLS	helicase, lymphoid specific	down
51704	GPRC5B	GPRC5B	G protein-coupled receptor class C group 5 member B	down
23052	ENDOD1	ENDOD1	endonuclease domain containing 1	down
1116	CHI3L1	CHI3L1	chitinase 3 like 1	down
4045	LSAMP	LSAMP	limbic system associated membrane protein	down
6285	S100B	S100B	S100 calcium binding protein B	down
55236	UBA6	UBA6	ubiquitin like modifier activating enzyme 6	down
1116	CHI3L1	CHI3L1	chitinase 3 like 1	down
121512	FGD4	FGD4	FYVE, RhoGEF and PH domain containing 4	down
29104	N6AMT1	N6AMT1	N-6 adenine-specific DNA methyltransferase 1	down
7056	THBD	THBD	thrombomodulin	down
79689	STEAP4	STEAP4	STEAP4 metalloreductase	down
5136	PDE1A	PDE1A	phosphodiesterase 1A	down
8893	EIF2B5	EIF2B5	eukaryotic translation initiation factor 2B subunit epsilon	down
7373	COL14A1	COL14A1	collagen type XIV alpha 1 chain	down
3875	KRT18	KRT18	keratin 18	down
6364	CCL20	CCL20	C-C motif chemokine ligand 20	down
5799	PTPRN2	PTPRN2	protein tyrosine phosphatase receptor type N2	down
60482	SLC5A7	SLC5A7	solute carrier family 5 member 7	down
121512	FGD4	FGD4	FYVE, RhoGEF and PH domain containing 4	down
5999	RGS4	RGS4	regulator of G protein signaling 4	down
79730	NSUN7	NSUN7	NOP2/Sun RNA methyltransferase family member 7	down
6542	SLC7A2	SLC7A2	solute carrier family 7 member 2	down
51554	ACKR4	ACKR4	atypical chemokine receptor 4	down
10659	CELF2	CELF2	CUGBP Elav-like family member 2	down
2687	GGT5	GGT5	gamma-glutamyltransferase 5	down
9967	THRAP3	THRAP3	thyroid hormone receptor associated protein 3	down
2150	F2RL1	F2RL1	F2R like trypsin receptor 1	down
4969	OGN	OGN	osteoglycin	down
2078	ERG	ERG	ETS transcription factor ERG	down
7544	ZFY	ZFY	zinc finger protein Y-linked	down
151126	ZNF385B	ZNF385B	zinc finger protein 385B	down
150	ADRA2A	ADRA2A	adrenoceptor alpha 2A	down
126638	RPTN	RPTN	repetin	down
54674	LRRN3	LRRN3	leucine rich repeat neuronal 3	down
80274	SCUBE1	SCUBE1	signal peptide, CUB domain and EGF like domain containing 1	down
7544	ZFY	ZFY	zinc finger protein Y-linked	down
64084	CLSTN2	CLSTN2	calsyntenin 2	down
8284	KDM5D	KDM5D	lysine demethylase 5D	down
10875	FGL2	FGL2	fibrinogen like 2	down
8788	DLK1	DLK1	delta like non-canonical Notch ligand 1	down
5067	CNTN3	CNTN3	contactin 3	down
7545	ZIC1	ZIC1	Zic family member 1	down
4155	MBP	MBP	myelin basic protein	down
7851	MALL	MALL	mal, T cell differentiation protein like	down
5570	PKIB	PKIB	cAMP-dependent protein kinase inhibitor beta	down
9086	EIF1AY	EIF1AY	eukaryotic translation initiation factor 1A Y-linked	down
64595	TTTY15	TTTY15	testis-specific transcript, Y-linked 15	down
8287	USP9Y	USP9Y	ubiquitin specific peptidase 9 Y-linked	down
54414	SIAE	SIAE	sialic acid acetylesterase	down
6328	SCN3A	SCN3A	sodium voltage-gated channel alpha subunit 3	down
3730	ANOS1	ANOS1	anosmin 1	down
8653	DDX3Y	DDX3Y	DEAD-box helicase 3 Y-linked	down
64595	TTTY15	TTTY15	testis-specific transcript, Y-linked 15	down
8287	USP9Y	USP9Y	ubiquitin specific peptidase 9 Y-linked	down
8653	DDX3Y	DDX3Y	DEAD-box helicase 3 Y-linked	down
9086	EIF1AY	EIF1AY	eukaryotic translation initiation factor 1A Y-linked	down
22829	NLGN4Y	NLGN4Y	neuroligin 4 Y-linked	down
6192	RPS4Y1	RPS4Y1	ribosomal protein S4 Y-linked 1	down
