# Supplementary material for: Ataluren Prevented Bone Loss Induced by Ovariectomy and Aging in Mice Through the BMP-SMAD Signaling Pathway
Source: Research Square preprint supplement (doi:10.21203/rs.3.rs-1427992/v1), 2022-03-22
Supplement: Supplementary file 2 [file e4eaea6397b322cb2c553b1a.docx]

Figure S1

Ataluren was the best candidate for osteoporosis in this drug screening. **a** Micro-CT and H&E staining images of femurs from SHAM+CMC, OVX+CMC, OVX+ATA, OVX+NATA and OVX+PRU. Femoral morphology in the OVX+ATA group recovered close to the level of the SHAM+CMC group. Micro-CT images are at a scale of 1 mm. H&E stained images are at a scale of 500 μm. **b** Compared to those treated with CMC, OVX mice fed by Ataluren had increased BMD(*p*<0.01), BV/TV(*p*<0.01) and Tb.N(*p*<0.01) and decreased BS/BV(*p*<0.05) and Tb.Sp(*p*<0.01) and those results closed to SHAM+CMC level. OVX mice fed by NATA had increased BMD(*p*<0.05), BV/TV(*p*<0.05), Tb.N(*p*<0.01) and decreased Tb.Sp(*p*<0.01) compared to OVX+CMC group, but still worse than SHAM+CMC group(*p*<0.05,*p*<0.05,*p*<0.01,*p*<0.05). Compared to those treated with CMC, OVX mice fed by PRU had only increased BV/TV(*p*<0.05), Tb.N(*p*<0.05) and decreased Tb.Sp(*p*<0.01),but BMD closed to OVX+CMC group, BV/TV(*p*<0.05) and Tb.N(*p*<0.01) was lower than SHAM+CMC group, Tb.Sp(*p*<0.05) was higher than SHAM+CMC group. All data shown are the mean ± SD in **b**, n=5. **P* < 0.05, ***P* < 0.01 by ANOVA.
